# Supplementary material for: Global Spread of Human Chromoblastomycosis Is Driven by Recombinant Cladophialophora carrionii and Predominantly Clonal Fonsecaea Species
Source: PubMed Central journal article supplement (PMC4619687; doi:10.1371/journal.pntd.0004004), 2015-10-23
Supplement: pntd.0004004.s006.pdf [file pntd.0004004.s006.pdf]

**S1Table Strains used in this study**

| <b>Name</b>                       | <b>Strains no.</b> | <b>Source</b>               | <b>Origin</b> | <b>Accession no.-BT2</b> | <b>Accession no.-ITS</b> |
|-----------------------------------|--------------------|-----------------------------|---------------|--------------------------|--------------------------|
| <i>Cladophialophora carrionii</i> | CBS 108.97         | Chromoblastomycosis, male   | Venezuela     | EU137188.1               | EU137306.1               |
| <i>Cladophialophora carrionii</i> | CBS 109.97         | Chromoblastomycosis, male   | Venezuela     | -                        | -                        |
| <i>Cladophialophora carrionii</i> | CBS 164.54         | Chromoblastomycosis, male   | Venezuela     | -                        | -                        |
| <i>Cladophialophora carrionii</i> | CBS 165.54         | Chromoblastomycosis, male   | Venezuela     | EU137187.1               | EU137305.1               |
| <i>Cladophialophora carrionii</i> | CBS 166.54         | Chromoblastomycosis, male   | Venezuela     | EU137173.1               | EU137290.1               |
| <i>Cladophialophora carrionii</i> | CBS 114392         | Chromoblastomycosis, female | Venezuela     | EU137150.1               | EU137267.1               |
| <i>Cladophialophora carrionii</i> | CBS 114393         | Chromoblastomycosis, male   | Venezuela     | EU137151.1               | EU137268.1 KF928452.1    |
| <i>Cladophialophora carrionii</i> | CBS 114394         | Chromoblastomycosis, male   | Venezuela     | -                        | EU137307.1               |
| <i>Cladophialophora carrionii</i> | CBS 114395         | Chromoblastomycosis, female | Venezuela     | EU137182.1               | EU137299.1               |
| <i>Cladophialophora carrionii</i> | CBS 114396         | Chromoblastomycosis, male   | Venezuela     | EU137152.1               | EU137269.1               |
| <i>Cladophialophora carrionii</i> | CBS 114397         | Chromoblastomycosis, male   | Venezuela     | EU137153.1               | EU137270.1               |
| <i>Cladophialophora carrionii</i> | CBS 114398         | Chromoblastomycosis, female | Venezuela     | EU137154.1               | EU137271.1               |
| <i>Cladophialophora carrionii</i> | CBS 114399         | Chromoblastomycosis, female | Venezuela     | EU137155.1               | EU137272.1               |
| <i>Cladophialophora carrionii</i> | CBS 114400         | Chromoblastomycosis, male   | Venezuela     | EU137156.1               | EU137273.1               |
| <i>Cladophialophora carrionii</i> | CBS 114401         | Chromoblastomycosis, female | Venezuela     | EU137157.1               | EU137274.1               |
| <i>Cladophialophora carrionii</i> | CBS 114402         | Chromoblastomycosis, female | Venezuela     | EU137158.1               | EU137275.1               |
| <i>Cladophialophora carrionii</i> | CBS 114403         | Chromoblastomycosis, male   | Venezuela     | EU137159.1               | EU137276.1               |
| <i>Cladophialophora carrionii</i> | CBS 114404         | Chromoblastomycosis, male   | Venezuela     | EU137196.1               | EU137311.1               |
| <i>Cladophialophora carrionii</i> | CBS 117889         | Chromoblastomycosis, female | Venezuela     | -                        | EU137280.1               |
| <i>Cladophialophora carrionii</i> | CBS 117890         | Chromoblastomycosis, male   | Venezuela     | -                        | EU137279.1               |
| <i>Cladophialophora carrionii</i> | CBS 117891         | Chromoblastomycosis, male   | Venezuela     | -                        | EU137278.1               |
| <i>Cladophialophora carrionii</i> | CBS 117893         | Chromoblastomycosis, male   | Venezuela     | EU137200.1               | EU137316.1               |
| <i>Cladophialophora carrionii</i> | CBS 117895         | Chromoblastomycosis, male   | Venezuela     | EU137169.1               | EU137286.1               |
| <i>Cladophialophora carrionii</i> | CBS 117896         | Chromoblastomycosis, male   | Venezuela     | -                        | EU137285.1               |
| <i>Cladophialophora carrionii</i> | CBS 117897         | Chromoblastomycosis, male   | Venezuela     | -                        | EU137314.1               |

|                                   |            |                             |           |            |                       |
|-----------------------------------|------------|-----------------------------|-----------|------------|-----------------------|
| <i>Cladophialophora carrionii</i> | CBS 117900 | Chromoblastomycosis, male   | Venezuela | -          | EU137284.1            |
| <i>Cladophialophora carrionii</i> | CBS 117901 | Chromoblastomycosis, female | Venezuela | EU137197.1 | EU137312.1            |
| <i>Cladophialophora carrionii</i> | CBS 117902 | Chromoblastomycosis, male   | Venezuela | -          | EU137283.1            |
| <i>Cladophialophora carrionii</i> | CBS 117903 | Chromoblastomycosis, male   | Venezuela | -          | EU137282.1            |
| <i>Cladophialophora carrionii</i> | CBS 117904 | Chromoblastomycosis, male   | Venezuela | -          | EU137281.1            |
| <i>Cladophialophora carrionii</i> | CBS 117905 | Chromoblastomycosis, male   | Venezuela | -          | EU137300.1            |
| <i>Cladophialophora carrionii</i> | CBS 117906 | Chromoblastomycosis, male   | Venezuela | EU137171.1 | EU137288.1            |
| <i>Cladophialophora carrionii</i> | CBS 117908 | Chromoblastomycosis, male   | Venezuela | EU137191.1 | -                     |
| <i>Cladophialophora carrionii</i> | CBS 117909 | Chromoblastomycosis, male   | Venezuela | EU137170.1 | EU137287.1            |
| <i>Cladophialophora carrionii</i> | CBS 860.96 | Dry plant debris            | Venezuela | -          | -                     |
| <i>Cladophialophora carrionii</i> | CBS 861.96 | Dry plant debris            | Venezuela | EU137194.1 | EU137309.1            |
| <i>Cladophialophora carrionii</i> | CBS 862.96 | Dry plant debris            | Venezuela | EU137199.1 | EU137315.1            |
| <i>Cladophialophora carrionii</i> | CBS 863.96 | Dry plant debris            | Venezuela | EU137179.1 | EU137296.1 KP131829.1 |
| <i>Cladophialophora carrionii</i> | CBS131833  | Chromoblastomycosis, male   | China     | -          | -                     |
| <i>Cladophialophora carrionii</i> | CBS131834  | Chromoblastomycosis, male   | China     | -          | -                     |
| <i>Cladophialophora carrionii</i> | CBS131835  | Chromoblastomycosis, male   | China     | -          | -                     |
| <i>Cladophialophora carrionii</i> | CBS131836  | Chromoblastomycosis, male   | China     | -          | -                     |
| <i>Cladophialophora carrionii</i> | CBS131838  | Chromoblastomycosis, male   | China     | -          | -                     |
| <i>Cladophialophora carrionii</i> | CBS131839  | Chromoblastomycosis, male   | China     | -          | -                     |
| <i>Cladophialophora carrionii</i> | CBS131840  | Chromoblastomycosis, male   | China     | -          | -                     |
| <i>Cladophialophora carrionii</i> | CBS131841  | Chromoblastomycosis, male   | China     | -          | -                     |
| <i>Cladophialophora carrionii</i> | CBS131842  | Chromoblastomycosis, male   | China     | -          | -                     |
| <i>Cladophialophora carrionii</i> | CBS131843  | Chromoblastomycosis, male   | China     | -          | -                     |
| <i>Cladophialophora carrionii</i> | CBS131844  | Chromoblastomycosis, male   | China     | -          | -                     |
| <i>Cladophialophora carrionii</i> | CBS131845  | Chromoblastomycosis, male   | China     | -          | -                     |
| <i>Cladophialophora carrionii</i> | CBS131846  | Chromoblastomycosis, male   | China     | -          | -                     |

|                                   |            |                           |            |            |                       |
|-----------------------------------|------------|---------------------------|------------|------------|-----------------------|
| <i>Cladophialophora carrionii</i> | CBS131847  | Chromoblastomycosis, male | China      | -          | -                     |
| <i>Cladophialophora carrionii</i> | CBS131848  | Chromoblastomycosis, male | China      | -          | -                     |
| <i>Cladophialophora carrionii</i> | CBS131850  | Chromoblastomycosis, male | China      | -          | -                     |
| <i>Cladophialophora carrionii</i> | CBS131851  | Chromoblastomycosis, male | China      | -          | -                     |
| <i>Cladophialophora carrionii</i> | CBS132096  | Chromoblastomycosis, male | China      | -          | -                     |
| <i>Cladophialophora carrionii</i> | CBS132097  | Chromoblastomycosis, male | China      | -          | -                     |
| <i>Cladophialophora carrionii</i> | CBS132100  | Chromoblastomycosis, male | China      | -          | -                     |
| <i>Cladophialophora carrionii</i> | CBS131837  | Chromoblastomycosis, male | China      | -          | -                     |
| <i>Cladophialophora carrionii</i> | CBS131854  | Chromoblastomycosis -     | Madagascar | -          | -                     |
| <i>Cladophialophora carrionii</i> | CBS131855  | Chromoblastomycosis -     | Madagascar | -          | -                     |
| <i>Cladophialophora carrionii</i> | CBS131856  | Chromoblastomycosis -     | Madagascar | -          | -                     |
| <i>Cladophialophora carrionii</i> | CBS131734  | Chromoblastomycosis -     | Madagascar | -          | -                     |
| <i>Cladophialophora carrionii</i> | CBS131735  | Chromoblastomycosis -     | Madagascar | -          | -                     |
| <i>Cladophialophora carrionii</i> | CBS131857  | Chromoblastomycosis -     | Madagascar | -          | -                     |
| <i>Cladophialophora carrionii</i> | CBS 100434 | Chromoblastomycosis, male | Madagascar | EU137172.1 | EU137289.1            |
| <i>Cladophialophora carrionii</i> | CBS 260.83 | Chromoblastomycosis, male | Uganda     | EU137175.1 | EU137292.1            |
| <i>Cladophialophora carrionii</i> | CBS 160.54 | Chromoblastomycosis, male | Australia  | EU137201.1 | EU137266.1 KF928453.1 |
| <i>Cladophialophora carrionii</i> | CBS 162.54 | Chromoblastomycosis, male | Australia  | EU137185.1 | EU137303.1 KF928451.1 |
| <i>Cladophialophora carrionii</i> | CBS 163.54 | Chromoblastomycosis, male | venezuela  | EU137186.1 | EU137304.1            |
| <i>Cladophialophora carrionii</i> | CBS131852  | Unknown -                 | Australia  | -          | -                     |
| <i>Cladophialophora carrionii</i> | CBS131853  | Unknown -                 | Australia  | -          | -                     |
| <i>Cladophialophora carrionii</i> | CBS 406.96 | Chromoblastomycosis, male | Australia  | EU137202.1 | EU137317.1            |

---
