# Supplementary material for: Global Spread of Human Chromoblastomycosis Is Driven by Recombinant Cladophialophora carrionii and Predominantly Clonal Fonsecaea Species
Source: PubMed Central journal article supplement (PMC4619687; doi:10.1371/journal.pntd.0004004), 2015-10-23
Supplement: pntd.0004004.s007.pdf [file pntd.0004004.s007.pdf]

## S2Table Strains used in this study

| Name                       | Strains no. | Source                        | Origin        | Accesion no.-BT2 | Accesion no.-ITS |
|----------------------------|-------------|-------------------------------|---------------|------------------|------------------|
| <i>nsecaea pedrosoi</i>    | CBS 342.34  | Chromoblastomycosis, man      | Brazil        | -                | EU938589.1       |
| <i>Fonsecaea pedrosoi</i>  | CBS 122741  | Chromoblastomycosis, man foot | Mexico        | -                | EU938590.1       |
| <i>Fonsecaea pedrosoi</i>  | CBS 122740  | Chromoblastomycosis, man foot | Mexico        | -                | -                |
| <i>Fonsecaea pedrosoi</i>  | CBS 273.66  | Mouse passage                 | Venezuela     | EU938565.1       | EU938587.1       |
| <i>Fonsecaea pedrosoi</i>  | CBS 274.66  | Mouse passage                 | Venezuela     | -                | -                |
| <i>Fonsecaea pedrosoi</i>  | CBS 253.49  | Chromoblastomycosis, man      | Uruguay       | EU938571.1       | AY366919.1       |
| <i>Fonsecaea pedrosoi</i>  | CBS 102247  | Chromoblastomycosis, man      | Brazil        | -                | -                |
| <i>Fonsecaea pedrosoi</i>  | CBS 102245  | Chromoblastomycosis, man      | Brazil        | EU938562.1       | -                |
| <i>Fonsecaea pedrosoi</i>  | CBS 201.31  | Auditory canal, gazelle       | Libiya        | EU938563.1       | -                |
| <i>Fonsecaea pedrosoi</i>  | CBS 670.66  | Mouse passage, soil           | Venezuela     | EU938564.1       | -                |
| <i>Fonsecaea pedrosoi</i>  | CBS 122736  | Chromoblastomycosis, man      | Mexico        | -                | -                |
| <i>Fonsecaea pedrosoi</i>  | CBS 285.47  | Chromoblastomycosis, man      | Puerto Rico   | EU938573.1       | -                |
| <i>Fonsecaea pedrosoi</i>  | CBS 102244  | Chromoblastomycosis, man      | Brazil        | -                | -                |
| <i>Fonsecaea pedrosoi</i>  | CBS 271.37  | Chromoblastomycosis, man      | South America | KN846971.1       | AY366920.1       |
| <i>Fonsecaea pedrosoi</i>  | CBS 659.76  | Chromoblastomycosis, man      | Argentina     | -                | KC886423.1       |
| <i>Fonsecaea pedrosoi</i>  | CBS 125749  | Chromoblastomycosis, man      | Brazil        | -                | -                |
| <i>Fonsecaea pedrosoi</i>  | CBS 212.77  | Chromoblastomycosis, man      | Netherlands   | EU938568.1       | AY366917.1       |
| <i>Fonsecaea pedrosoi</i>  | CBS 272.37  | Chromoblastomycosis, man      | Brazil        | -                | -                |
| <i>Fonsecaea pedrosoi</i>  | CBS 122849  | Chromoblastomycosis, man      | Mexico        | -                | -                |
| <i>Fonsecaea pedrosoi</i>  | CBS 117910  | Chromoblastomycosis, human    | Venezuela     | -                | EU938595.1       |
| <i>Fonsecaea pedrosoi</i>  | CBS 102224  | Wood, Grevillea, plant        | Brazil        | -                | FJ785471.1       |
| <i>Fonsecaea monophora</i> | CBS 123849  | Chromoblastomycosis, man      | Africa        | -                | -                |
| <i>Fonsecaea monophora</i> | CBS 397.48  | Chromoblastomycosis, man      | Brazil        | EU938555.1       | EU938579.1       |
| <i>Fonsecaea monophora</i> | CBS 102243  | Chromoblastomycosis, man      | Brazil        | -                | -                |
| <i>Fonsecaea monophora</i> | CBS 102246  | Chromoblastomycosis, man      | Brazil        | EU938543.1       | -                |

|                            |            |                                 |               |            |            |
|----------------------------|------------|---------------------------------|---------------|------------|------------|
| <i>Fonsecaea monophora</i> | CBS 102248 | Chromoblastomycosis, man        | Brazil        | EU938550.1 | AY857511.1 |
| <i>Fonsecaea monophora</i> | CBS 269.37 | Chromoblastomycosis, man        | South America | -          | EU938584.1 |
| <i>Fonsecaea monophora</i> | CBS 117542 | Brain, biopsy, man              | USA           | -          | -          |
| <i>Fonsecaea monophora</i> | CBS 117237 | Chromoblastomycosis, man leg    | USA           | EU938544.1 | -          |
| <i>Fonsecaea monophora</i> | CBS 115830 | Brain, human                    | Brazil        | EU938548.1 | -          |
| <i>Fonsecaea monophora</i> | CBS 121725 | Chromoblastomycosis, human      | China         | -          | -          |
| <i>Fonsecaea monophora</i> | CBS 289.93 | lymphnode, seabear              | Netherlands   | EU938554.1 | -          |
| <i>Fonsecaea monophora</i> | CBS 121721 | Chromoblastomycosis, human      | China         | -          | -          |
| <i>Fonsecaea monophora</i> | CBS 121722 | Chromoblastomycosis, human      | China         | -          | -          |
| <i>Fonsecaea monophora</i> | CBS 121723 | Chromoblastomycosis, human      | China         | -          | -          |
| <i>Fonsecaea monophora</i> | CBS 121724 | Chromoblastomycosis, human      | China         | -          | -          |
| <i>Fonsecaea monophora</i> | CBS 121726 | Chromoblastomycosis, human      | China         | -          | -          |
| <i>Fonsecaea monophora</i> | CBS 121727 | Chromoblastomycosis, human      | China         | -          | -          |
| <i>Fonsecaea monophora</i> | CBS 121728 | Chromoblastomycosis, human      | China         | -          | -          |
| <i>Fonsecaea monophora</i> | CBS 121729 | Chromoblastomycosis, human      | China         | -          | -          |
| <i>Fonsecaea monophora</i> | CBS 121730 | Chromoblastomycosis, human      | China         | -          | --         |
| <i>Fonsecaea monophora</i> | CBS 121731 | Chromoblastomycosis, human      | China         | -          | -          |
| <i>Fonsecaea monophora</i> | CBS 121732 | Chromoblastomycosis, human      | China         | -          | -          |
| <i>Fonsecaea monophora</i> | CBS 117238 | Brain, human                    | UK            | -          | -          |
| <i>Fonsecaea monophora</i> | CBS 102238 | Soil                            | Brazil        | EU938546.1 | -          |
| <i>Fonsecaea monophora</i> | CBS 102242 | Chromoblastomycosis, man        | Brazil        | EU938549.1 | -          |
| <i>Fonsecaea monophora</i> | CBS 117236 | Brain abscess, man              | USA           | EU938551.1 | -          |
| <i>Fonsecaea monophora</i> | SUMS 0300  | Chromoblastomycosis, human      | China         | EU938556.1 | -          |
| <i>Fonsecaea monophora</i> | SUMS 0324  | Chromoblastomycosis, human      | China         | EU938557.1 | -          |
| <i>Fonsecaea monophora</i> | SUMS 0322  | Chromoblastomycosis, human      | China         | EU938558.1 | EU938581.1 |
| <i>Fonsecaea monophora</i> | CBS 102229 | Decaying vegetable cover, plant | Brazil        | -          | -          |

|                         |            |                            |               |            |             |
|-------------------------|------------|----------------------------|---------------|------------|-------------|
| <i>Fonsecaea nubica</i> | CBS 121733 | Chromoblastomycosis, human | China         | -          | -           |
| <i>Fonsecaea nubica</i> | CBS 444.62 | Chromoblastomycosis, human | Surinam       | EU938575.1 | KP132198.1  |
| <i>Fonsecaea nubica</i> | CBS 121720 | Chromoblastomycosis, human | China         | -          | NR_111333.1 |
| <i>Fonsecaea nubica</i> | CBS 269.64 | Chromoblastomycosis, human | Africa        | -          | -           |
| <i>Fonsecaea nubica</i> | CBS 121734 | Chromoblastomycosis, human | China         | -          | -           |
| <i>Fonsecaea nubica</i> | CBS 271.33 | Chromoblastomycosis, human | South America | EU938578.1 | -           |
| <i>Fonsecaea nubica</i> | CBS 270.37 | Unknown                    | France        | -          | EU938594.1  |
| <i>Fonsecaea nubica</i> | CBS 277.29 | Chromoblastomycosis, man   | Brazil        | -          | EU938593.1  |
| <i>Fonsecaea nubica</i> | CBS 557.76 | Unknown                    | Unknown       | -          | -           |

---
