# Supplementary material for: Global Spread of Human Chromoblastomycosis Is Driven by Recombinant Cladophialophora carrionii and Predominantly Clonal Fonsecaea Species
Source: PubMed Central journal article supplement (PMC4619687; doi:10.1371/journal.pntd.0004004), 2015-10-23
Supplement: pntd.0004004.s008.pdf [file pntd.0004004.s008.pdf]

**S3 Table Summary of Max  $\chi^2$ , GARD and PHI based on the ITS and *BT2* data  
in *Cladophialophora carrionii* and *Fonsecaea* spp.**

| Group                | Max $\chi^2$     |                  | GARD |            | PHI      |            |
|----------------------|------------------|------------------|------|------------|----------|------------|
|                      | ITS              | <i>BT2</i>       | ITS  | <i>BT2</i> | ITS      | <i>BT2</i> |
| <i>C.carrionii</i>   | 13.71 (p = 0.03) | 17.75 (p = 0.02) | -    | +          | P = 0.30 | P = 0.02   |
| <i>Fonsecaea spp</i> | 25.62 (p = 0.00) | 9.32 (p = 0.46)  | -    | -          | P = 0.82 | P = 0.21   |

GARD: genetic analysis for recombination detection

PHI: the pairwise homoplasy index SplitsTree 4
